# Supplementary material for: Single molecule magnet behaviour in a rare trinuclear {CrIIIDyIII2} methoxo-bridged complex
Source: Royal Society of Chemistry journal article supplement (doi:10.1039/c5dt02459e), 2015-01-01
Supplement: c5dt02459e1.pdf [file c5dt02459e1.pdf]

# Single molecule magnet behaviour in a rare trinuclear {Cr<sup>III</sup>Dy<sup>III</sup><sub>2</sub>} methoxo-bridged complex

Pierre-Emmanuel Car,<sup>\*a,b</sup> Annaïck Favre,<sup>a</sup> Andrea Caneschi,<sup>a</sup> and Roberta Sessoli<sup>a</sup>

<sup>a</sup> *Dipartimento di Chimica Ugo Schiff & UdR INSTM, Università degli Studi di Firenze, Vial della Lastruccia 3-13, 50019 Sesto Fiorentino (Italy).*

<sup>b</sup> *Present address: Department of Chemistry, University of Zurich, Winterthurerstrasse 190, CH-8057 Zurich, Switzerland.*

Corresponding author: [pierre-emmanuel.car@chem.uzh.ch](mailto:pierre-emmanuel.car@chem.uzh.ch)

## Detailed Experiment:

### General Remarks

All reactions were carried out under the exclusion of moisture, unless otherwise stated. DyCl<sub>3</sub>·3CH<sub>3</sub>OH was synthesized following a procedure reported by Mehrotra & *al.*<sup>[1]</sup> CrCl<sub>3</sub>(THF)<sub>3</sub> was prepared following a procedure reported by Zeiss.<sup>[2]</sup> Sodium metal and dipivaloymethane (Hdpm) were used as received. Diethyl ether (Et<sub>2</sub>O) was distilled from sodium/benzophenone before use. Reagent-grade methanol (CH<sub>3</sub>OH) was carefully dried by treatment with Mg/I<sub>2</sub> and distilled with CaH<sub>2</sub> before use.<sup>[3]</sup> NaOMe was used as a 3.0 M solution in methanol freshly prepared by careful addition of sodium metal to anhydrous methanol under an inert atmosphere. Dimethoxyethane and acetonitrile were dried and distilled from CaH<sub>2</sub> before use.

### Synthesis

DyCl<sub>3</sub>·3CH<sub>3</sub>OH (0.8 mmol) was dissolved in 50 mL of CH<sub>3</sub>OH/Et<sub>2</sub>O (v:v, 1:2). After complete dissolution, a mixture of Hdpm (1.6 mmol) in 5 mL of CH<sub>3</sub>OH was added slowly. After 2 hours under stirring, CrCl<sub>3</sub>(THF)<sub>3</sub> (0.267 mmol) was added and the mixture stirred until complete dissolution. To the resulting light purple solution, fresh NaOMe (3.2 mmol) was added drop by drop. The mixture was stirred 2 hours more and kept undisturbed overnight.

After one night undisturbed, the NaCl formed was removed by filtration on a G4 frit and washed two times with diethyl ether. The solution was evaporated to dryness under vacuum until getting a green residu. Then, 4 mL of fresh distilled dimethoxyethane and the tripodal ligand H<sub>3</sub>L = 1,1,1-Tris(hydroxymethyl)-ethane (0.67 mmol) were added to the green residu, refluxed during 4 hours, cooled to room temperature and kept undisturbed overnight in a fridge.

After one night in a fridge, the mixture was filtrated and the precipitate washed with few mL of fresh distilled acetonitrile. To the filtrate, two volumes of acetonitrile were added and the mixture was refluxed 2 hours, cooled to room temperature and filtrated to evacuate residual particles. The solvent was evacuated under vacuum and the powder dissolved in diethyl ether. Single crystals suitable for X-ray diffraction analysis were obtained by vapor diffusion of methanol in a closed box. Yield: 21.8 mg, based on DyCl<sub>3</sub>·3CH<sub>3</sub>OH. Elemental analysis calculated for Cr<sub>1</sub>Dy<sub>2</sub>C<sub>61</sub>O<sub>16</sub>H<sub>115</sub> (%): Cr 3.5, Dy 21.9, C 49.4, H 7.8; found: Cr 3.2, Dy 21.6, C 45.1, H 7.4.

## X-ray Crystallography

A very light purple crystal of  $[\text{CrDy}_2(\text{OCH}_3)_4(\text{dpm})_5(\text{CH}_3\text{OH})]\cdot\text{CH}_3\text{OH}$  (**1**) was mounted on a glass capillary, blocked in grease with  $\text{N}_2$  flux (data were collected at 150 K) and transferred to a Oxford Kappa CCD diffractometer. Single crystal X-ray diffraction data were collected at 183(1) K on an *Agilent technologies XCalibur Sapphire3* area detector diffractometers equipped with single wavelength Enhance X-ray source with  $\text{Mo K}_\alpha$  radiation ( $\lambda = 0.71069\text{\AA}$ ) from a micro-focus X-ray source. The selected suitable single crystals were mounted using polybutene oil on a flexible loop fixed on a goniometer head and immediately transferred to the diffractometer. Pre-experiment, data collection, data reduction and analytical absorption correction<sup>[4]</sup> were performed with the program suite *CrysAlisPro*.<sup>[5]</sup> Using *Olex2*,<sup>[6]</sup> the structures were solved by the *Superflip*<sup>[7]</sup> structure solution program using Charge Flipping and refined with the *SHELXL2013*<sup>[8]</sup> program package by full-matrix least-squares minimization on  $F^2$ . *Platon*<sup>[9]</sup> was used to check the results of the X-ray analyses. The *CrysAlisPro* program was used to determine the unit cell parameters and for data collection. The structure was solved by direct methods and refined against  $F^2$  full-matrix least-squares techniques. Hydrogen atoms were included using Refxyz model (refined H-atom coordinated only). Complete crystallographic data for **1** are listed in Table S1. CCDC-1408766 for **1** contains the supplementary crystallographic data for this paper. The data can be obtained free of charge from the Cambridge Data Center ([www.ccdc.cam.ac.uk/data\\_request/cif](http://www.ccdc.cam.ac.uk/data_request/cif)).

**Table S1.** Crystallographic data and structural refinements for compound (**1**).

|                                                   | ( <b>1</b> )                                                     |
|---------------------------------------------------|------------------------------------------------------------------|
| Empirical formula                                 | $\text{Cr}_1\text{Dy}_2\text{O}_{16}\text{C}_{61}\text{H}_{115}$ |
| Formula weight ( $\text{g}\cdot\text{mol}^{-1}$ ) | 1481.54                                                          |
| Temperature                                       | 293 K                                                            |
| Radiation ( $\lambda/\text{\AA}$ )                | 0.71069                                                          |
| Crystal system                                    | triclinic                                                        |
| Space group                                       | $P-1$                                                            |
| $a$ ( $\text{\AA}$ )                              | 10.849(5)                                                        |
| $b$ ( $\text{\AA}$ )                              | 14.788(5)                                                        |
| $c$ ( $\text{\AA}$ )                              | 24.988(5)                                                        |
| $\alpha$ ( $^\circ$ )                             | 102.980(5)                                                       |
| $\beta$ ( $^\circ$ )                              | 94.757(5)                                                        |
| $\gamma$ ( $^\circ$ )                             | 109.062(5)                                                       |
| $V$ ( $\text{\AA}^3$ )                            | 3639(2)                                                          |
| $Z$                                               | 2                                                                |
| $\rho_{\text{calc}}$ ( $\text{g}/\text{cm}^3$ )   | 1.351                                                            |
| Crystal size                                      | $0.32 \times 0.12 \times 0.07$                                   |
| Reflections collected/unique                      | 28156/11696 [ $R_{\text{int}} = 0.0808$ ]                        |
| Unique observed reflections                       | 6509                                                             |
| $\theta$ range ( $^\circ$ )                       | 4.11-24.99                                                       |
| $F(000)$                                          | 1528                                                             |
| Data/restraints/parameters                        | 6509/255/783                                                     |
| Goodness-of-fit                                   | 0.872                                                            |
| $R_1^a$ [ $I > 2\theta(I)$ ]                      | 0.0518                                                           |
| $wR_2^b$                                          | 0.1094                                                           |
| $R_1^a$ [ $I > 2\theta(I)$ ] (all data)           | 0.1032                                                           |
| $wR_2^b$ (all data)                               | 0.1196                                                           |

$$R_1 = \Sigma(F_o - F_c) / \Sigma F_o \text{ and } wR_2 = \{\Sigma w(F_o^2 - F_c^2)^2 / \Sigma w(F_o^2)^2\}^{1/2}$$

**Table S2.** Selected bond distances and BVS value for (1).

| Bond        | Distance (Å) | Bond        | Distance (Å) |
|-------------|--------------|-------------|--------------|
| Cr(1)-O(1)  | 2.019(5)     | Dy(2)-O(1)  | 2.449(5)     |
| Cr(1)-O(3)  | 1.986(5)     | Dy(2)-O(2)  | 2.544(5)     |
| Cr(1)-O(4)  | 1.960(5)     | Dy(2)-O(3)  | 2.478(5)     |
| Cr(1)-O(5)  | 1.925(5)     | Dy(2)-O(4)  | 2.279(5)     |
| Cr(1)-O(14) | 1.946(6)     | Dy(2)-O(10) | 2.293(6)     |
| Cr(1)-O(15) | 1.955(6)     | Dy(2)-O(11) | 2.266(6)     |
| Dy(1)-O(1)  | 2.160(5)     | Dy(2)-O(12) | 2.336(5)     |
| Dy(1)-O(2)  | 2.557(5)     | Dy(2)-O(13) | 2.270(6)     |
| Dy(1)-O(3)  | 2.447(6)     |             |              |
| Dy(1)-O(5)  | 2.289(5)     |             |              |
| Dy(1)-O(6)  | 2.279(5)     |             |              |
| Dy(1)-O(7)  | 2.306(5)     |             |              |
| Dy(1)-O(8)  | 2.313(6)     |             |              |
| Dy(1)-O(9)  | 2.279(6)     |             |              |
|             |              | Atom        | BVS value    |
|             |              | Cr(1)       | 3.14         |

**Table S3.** Selected angles for (1).

|                  | Angle (°) |                  | Angle (°) |
|------------------|-----------|------------------|-----------|
| Cr(1)-O(1)-Dy(1) | 89.1(2)   | Dy(1)-O(1)-Dy(2) | 104.8(2)  |
| Cr(1)-O(1)-Dy(2) | 88.9(2)   | Dy(1)-O(2)-Dy(2) | 99.4(2)   |
| Cr(1)-O(3)-Dy(1) | 90.2(2)   | Dy(1)-O(3)-Dy(2) | 104.2(2)  |
| Cr(1)-O(3)-Dy(2) | 88.7(2)   |                  |           |
| Cr(1)-O(4)-Dy(2) | 95.4(2)   |                  |           |
| Cr(1)-O(5)-Dy(1) | 96.5(2)   |                  |           |

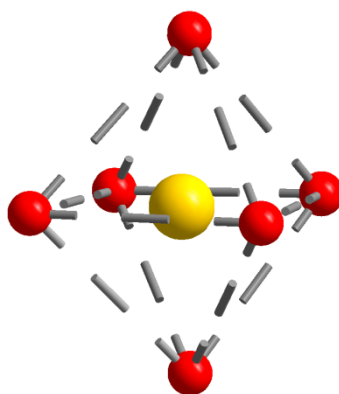**Figure S1.** Representation of the octahedral geometry around Cr1. Colour code: Cr: yellow, O: red.

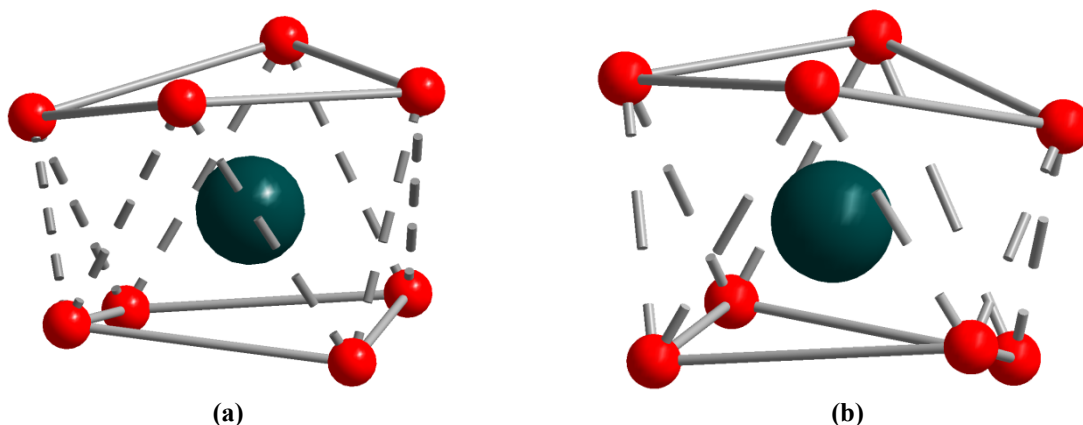

**Figure S2.** Representation of the distorted square-antiprism geometry around Dy1 (left, (a)) and Dy2 (right, (b)). Colour code: Dy: teal, O: red.

**Table S4.** Details<sup>[10]</sup> of the structural parameters of the distorted square antiprismatic geometry of Dy1 and Dy2.

|            |                             |            |            |                             |            |
|------------|-----------------------------|------------|------------|-----------------------------|------------|
| <b>Dy1</b> | $\Phi_{\text{average}}$     | 46.3°      | <b>Dy2</b> | $\Phi_{\text{average}}$     | 46.4°      |
|            | $\alpha_{\text{average}}$   | 57.7°      |            | $\alpha_{\text{average}}$   | 58.4°      |
|            | $d_{\text{pp}}(\text{min})$ | 2.431(9) Å |            | $d_{\text{pp}}(\text{min})$ | 2.431(9) Å |
|            | $d_{\text{pp}}(\text{max})$ | 3.334(1) Å |            | $d_{\text{pp}}(\text{min})$ | 3.227(8) Å |
|            | $d_{\text{in}}(\text{min})$ | 2.637(7) Å |            | $d_{\text{in}}(\text{min})$ | 2.658(9) Å |
|            | $d_{\text{pp}}(\text{max})$ | 3.024(8) Å |            | $d_{\text{in}}(\text{min})$ | 3.090(7) Å |

$\Phi$ : the skew angle between the diagonals of the two squares (45° in the ideal  $D_{4d}$  symmetry);  $\alpha$ : the angle between the S8 axis and a Dy-O direction (magic angle of 54.74° in the ideal  $D_{4d}$  symmetry);  $d_{\text{pp}}$ : the distance between the two parallel  $O_4$  squares;  $d_{\text{in}}$ : the shorter O-O distance in the  $O_4$  square.

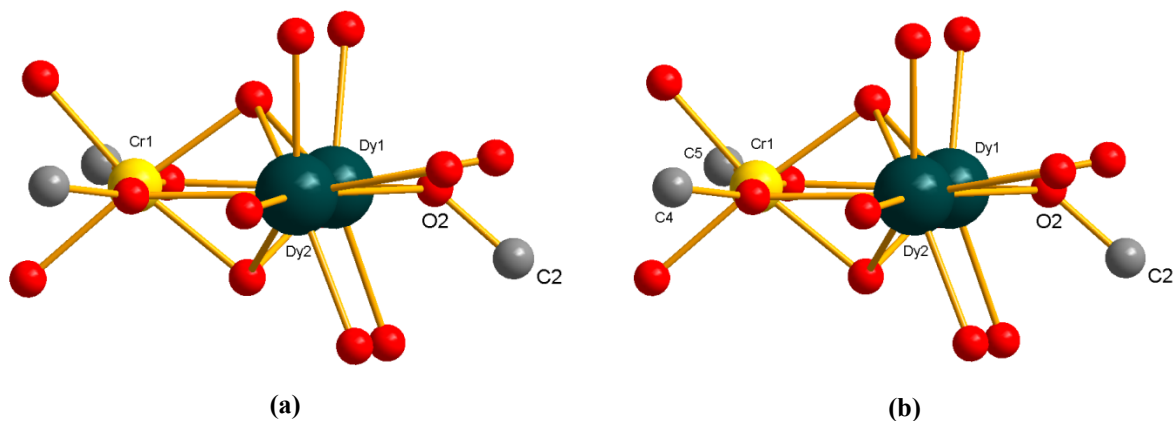

**Figure S3.** Ball and stick representation of the {C2O2} arrangement out of the plan formed by {Cr1Dy1Dy2} (left, (a)); and of the arrangement of the C4 and C5 atoms.

## Magnetic Investigations

Direct-current (dc) susceptibility measurements were performed by using a Quantum Design MPMS Squid magnetometer on 10.6 mg of microcrystalline  $[\text{CrDy}_2(\text{OCH}_3)_4(\text{dpm})_5(\text{CH}_3\text{OH})]\cdot\text{CH}_3\text{OH}$  pressed in a pellet to avoid field induced orientation of the crystallites.

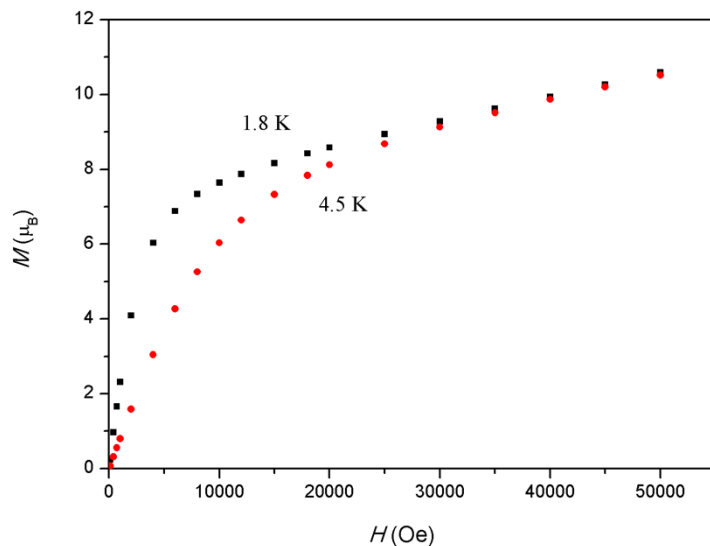

**Figure S6.** Field dependence of magnetization for **1** at 1.8 K and 4.5 K.

Alternating-current (ac) susceptibility measurements were performed in zero applied field on a home-made inductive probe adapted to an Oxford instruments Maglab2000 platform, between 1.6 and 6 K, under ac frequencies ranging between 0.1-60 kHz. In a second time further ac susceptibility measurements were carried out under a field 800 Oe, and ac frequencies ranging between 0.1-60 kHz.

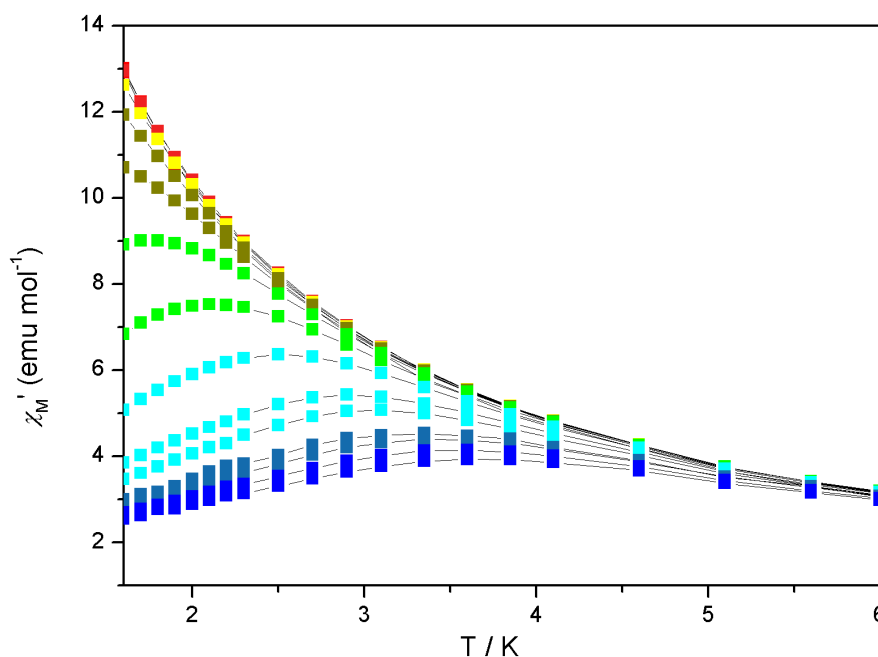

**Figure S7.** Temperature dependence of the in-phase  $\chi_M'$  component of the molar ac susceptibility of **1** measured under zero dc field in the 1.6-6 K temperature range, and under frequencies from 0.1 (red) to 60 kHz (blue).

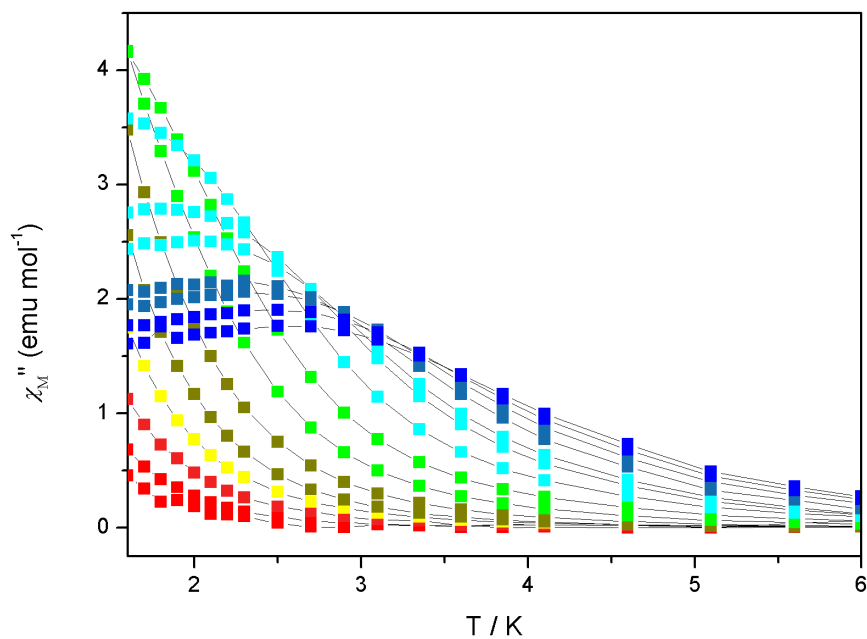

**Figure S8.** Temperature dependence of the out-of-phase  $\chi_M''$ , component of the molar ac susceptibility of **1** measured under zero dc field in the 1.6-6 K temperature range, and under frequencies from 0.1 (red) to 60 kHz (blue).

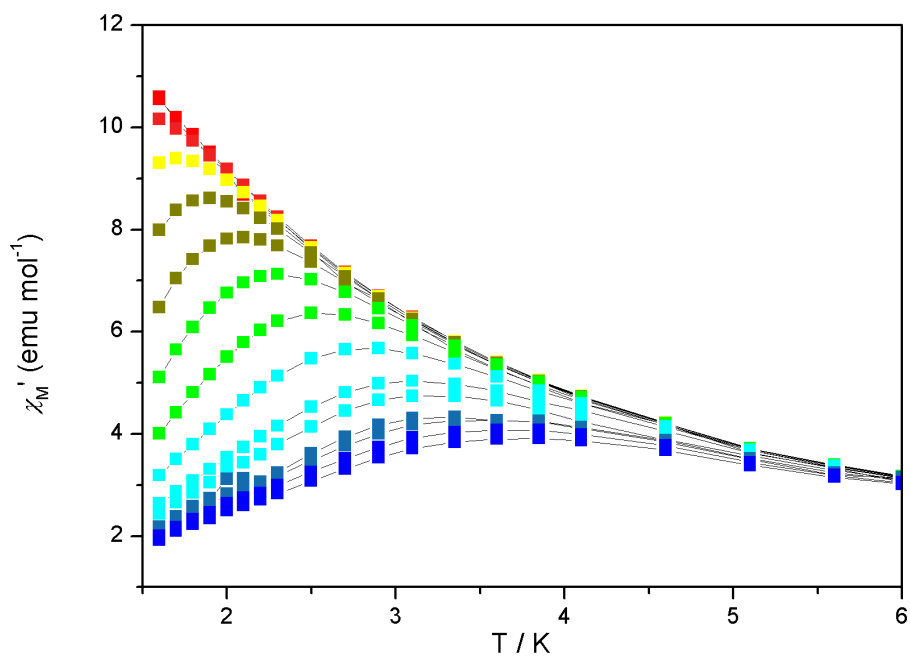

**Figure S9.** Temperature dependence of the in-phase  $\chi_M'$ , component of the molar ac susceptibility of **1** measured under a 800Oe dc field in the 1.6-6 K temperature range, and under frequencies from 0.1 (red) to 60 kHz (blue).

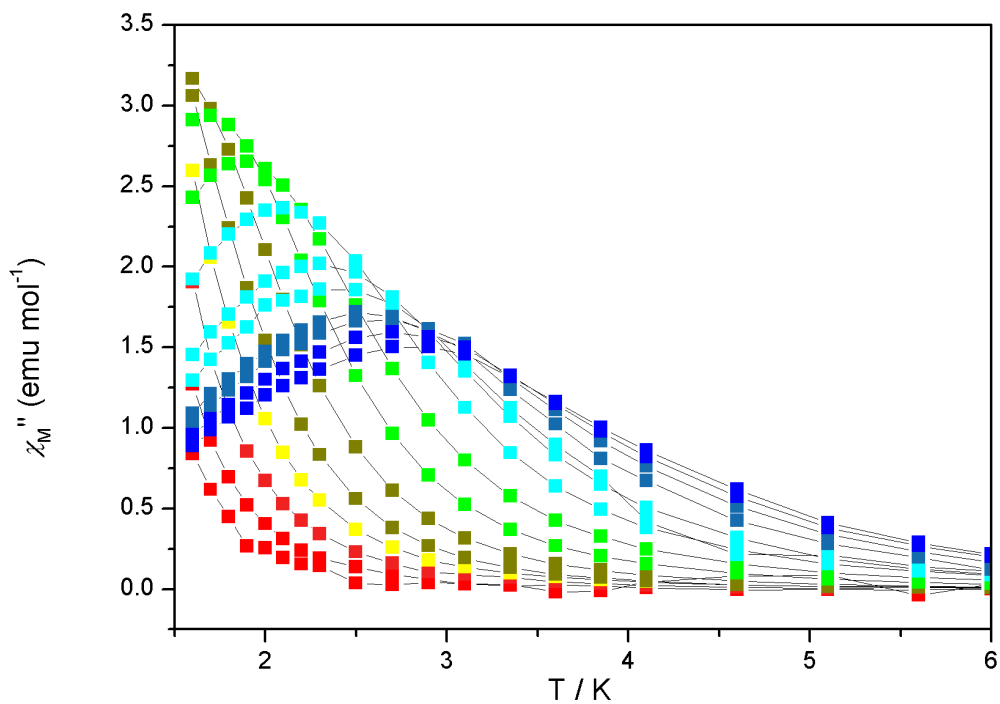

**Figure S10.** Temperature dependence of the out-of-phase  $\chi_M''$ , component of the molar ac susceptibility of **1** measured under a 800Oe dc field in the 1.6-6 K temperature range, and under frequencies from 0.1 (red) to 60 kHz (blue).

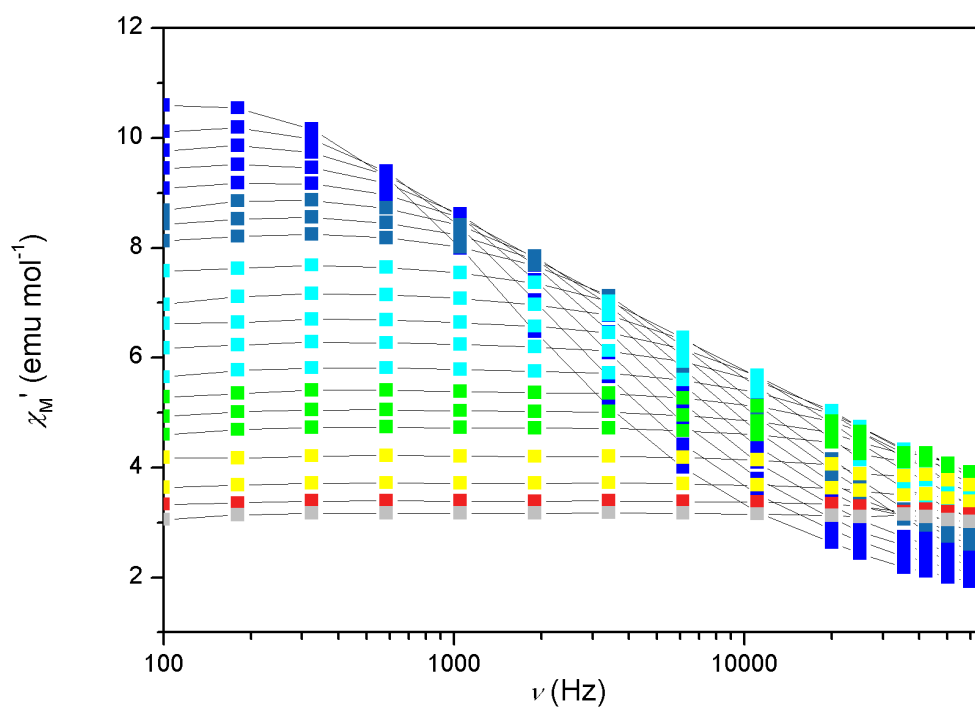

**Figure S11.** Frequency dependence of the in-of-phase  $\chi_M'$ , component of the molar ac susceptibility of **1** measured at 800Oe dc field in the 0.1-60 kHz frequency range from 1.6 (blue) to 6 K (grey).

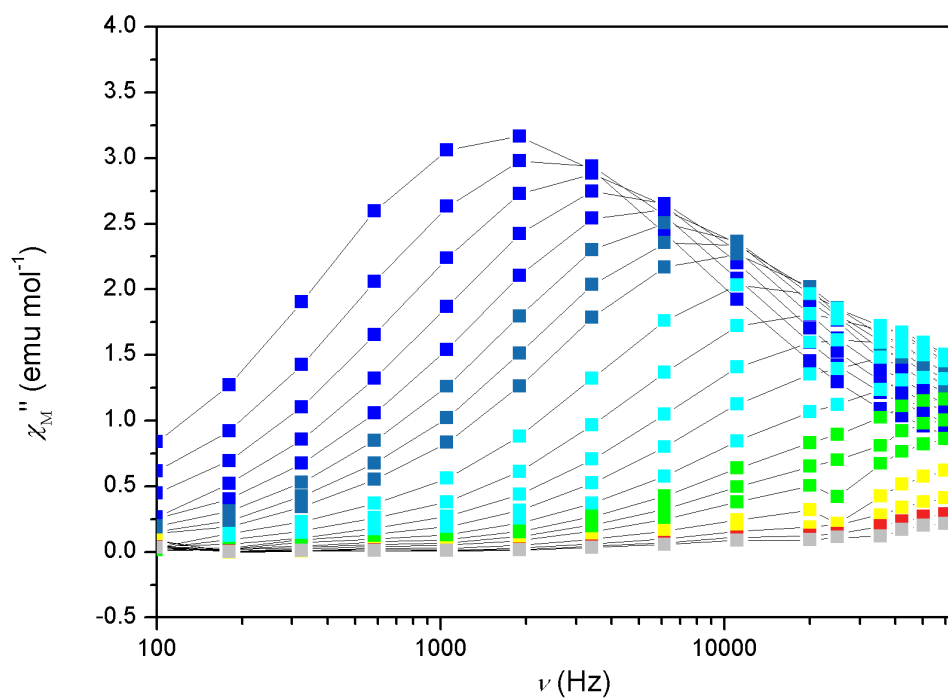

**Figure S12.** Frequency dependence of the out-of-phase  $\chi_M''$ , component of the molar ac susceptibility of **1** measured at 800Oe dc field in the 0.1-60 kHz frequency range from 1.6 (blue) to 6 K (grey).

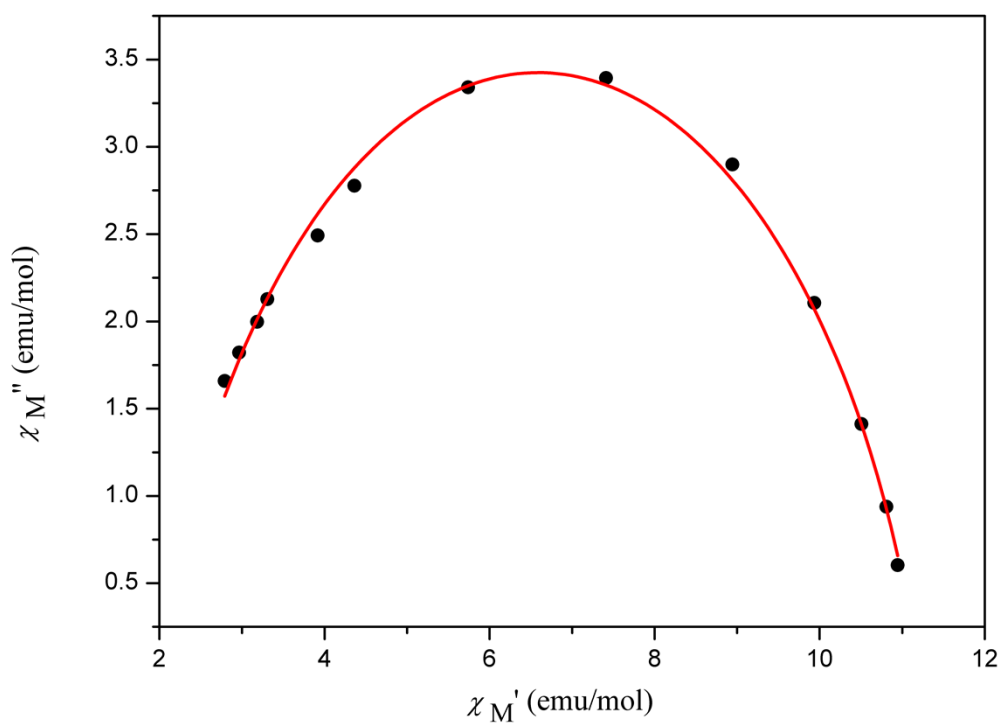

**Figure S13.** Example of best fit at 1.9 K (in 0 Oe dc field). Cole-Cole plot of  $\chi_M'$  vs  $\chi_M''$ . The red solid line represents the best fit.



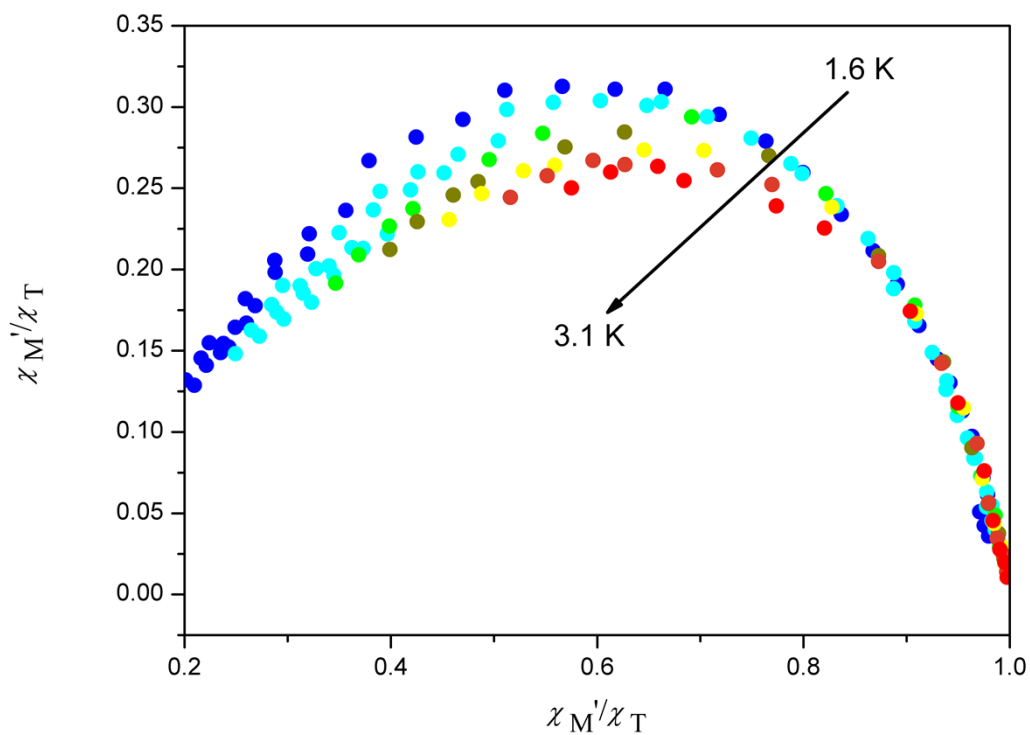

**Figure S14.** Argand diagram in the temperature range 1.6-3.1 K, in 0 Oe dc field. The curves were normalized by the isothermal susceptibility ( $\chi_T$ ). The best fits for all temperatures were omitted to facilitate the lecture.

**Table S5.** Main fitting parameters for the Argand plot, under a 0 Oe external field.

| H(Oe) | T(K) | $\alpha$ | R <sup>2</sup> | $\chi_T$ |
|-------|------|----------|----------------|----------|
| 0     | 1.6  | 0.19     | 0.98383        | 13.39    |
| 0     | 1.7  | 0.19     | 0.98593        | 12.54    |
| 0     | 1.8  | 0.18     | 0.98565        | 11.79    |
| 0     | 1.9  | 0.18     | 0.99323        | 11.19    |
| 0     | 2.0  | 0.17     | 0.99431        | 10.60    |
| 0     | 2.1  | 0.17     | 0.99437        | 10.05    |
| 0     | 2.2  | 0.16     | 0.99484        | 9.54     |
| 0     | 2.3  | 0.15     | 0.99586        | 9.08     |
| 0     | 2.5  | 0.15     | 0.99695        | 8.31     |
| 0     | 2.7  | 0.14     | 0.99750        | 7.63     |
| 0     | 2.9  | 0.14     | 0.99746        | 7.06     |
| 0     | 3.1  | 0.14     | 0.99766        | 6.56     |

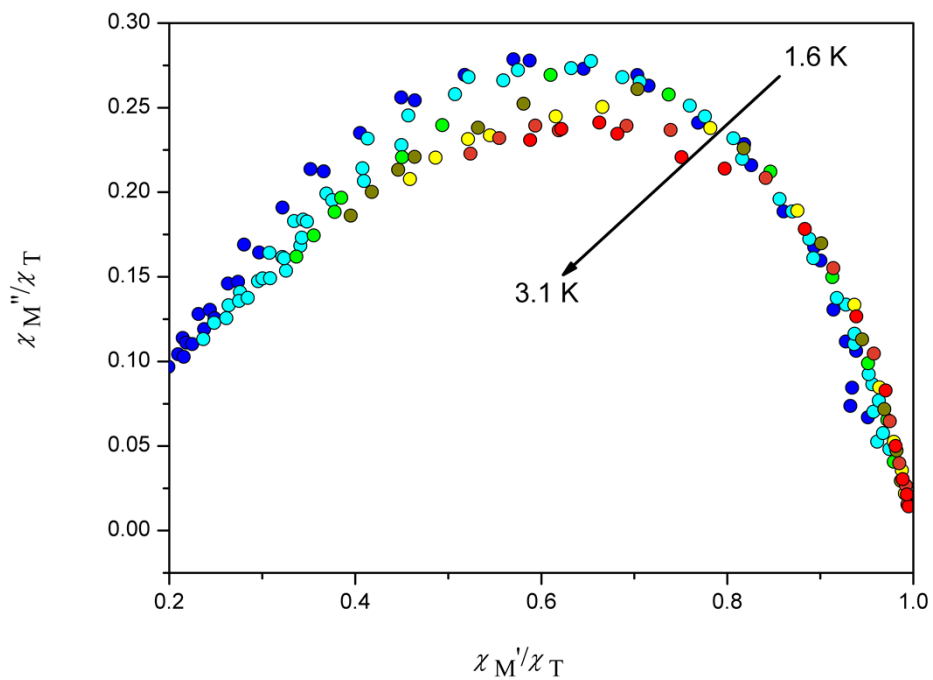

**Figure S15.** Argand diagram in the temperature range 1.6-3.1 K, under a 800 Oe external field. The curves were normalized by the isothermal susceptibility ( $\chi_T$ ). The best fits for all temperatures were omitted to facilitate the lecture.

**Table S6.** Main fitting parameters for the Argand plot, under a 800 Oe external field.

| H(Oe) | T(K) | $\alpha$ | R <sup>2</sup> | $\chi_T$ |
|-------|------|----------|----------------|----------|
| 800   | 1.6  | 0.27     | 0.95447        | 11.36    |
| 800   | 1.7  | 0.27     | 0.97546        | 10.91    |
| 800   | 1.8  | 0.26     | 0.97393        | 10.37    |
| 800   | 1.9  | 0.24     | 0.97031        | 8.89     |
| 800   | 2.0  | 0.24     | 0.97183        | 9.57     |
| 800   | 2.1  | 0.23     | 0.98241        | 9.16     |
| 800   | 2.2  | 0.22     | 0.98584        | 8.78     |
| 800   | 2.3  | 0.21     | 0.98784        | 8.42     |
| 800   | 2.5  | 0.19     | 0.99174        | 7.79     |
| 800   | 2.7  | 0.18     | 0.99314        | 7.23     |
| 800   | 2.9  | 0.17     | 0.99441        | 6.74     |
| 800   | 3.1  | 0.17     | 0.99438        | 6.31     |

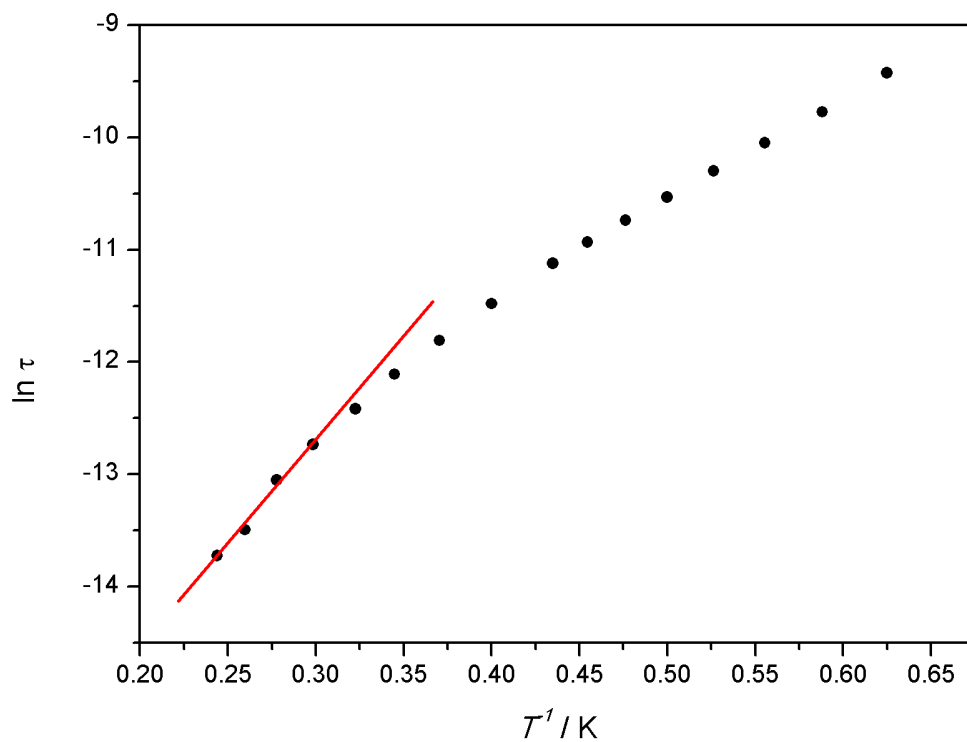

**Figure S16.** Arrhenius plot (under a 800 Oe external field) with best fit of the high temperature region.

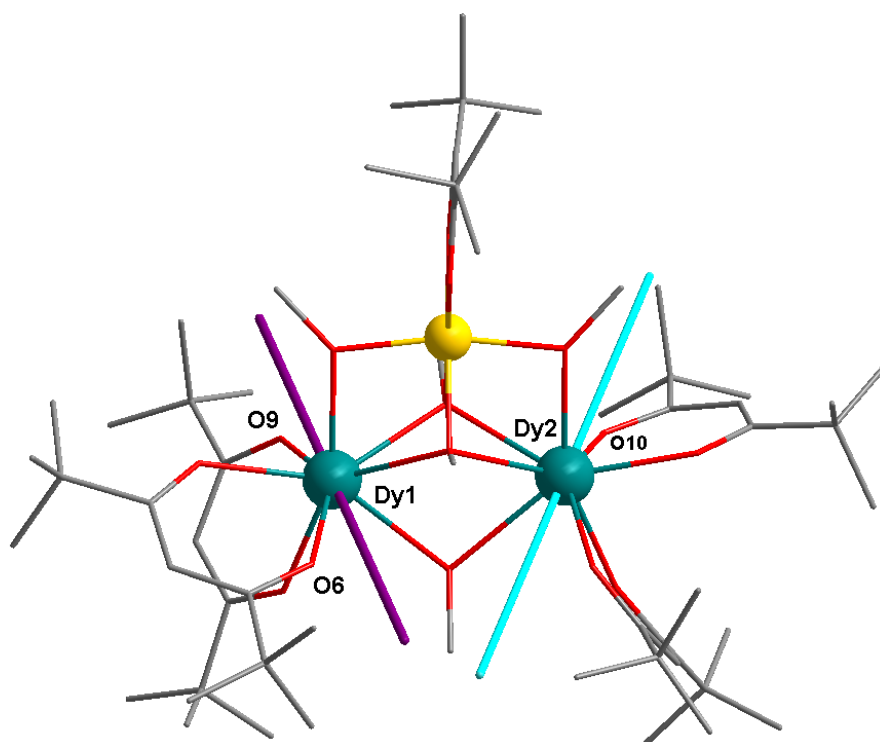

**Figure S17** The ground state magnetic anisotropy directions for the Dy ions in **1**, in purple and turquoise rods for Dy1 and Dy2 ions, respectively, calculated with the electrostatic model. Dy = teal, Cr = yellow, O = red, C = grey.

## References

- [1] R. C. Mehrotra, T. N. Misra, S. N. Misra, *Jour. Indian Chem. Soc.*, **1965**, 42, 351.
- [2] W. Herwig, H. H. Zeiss, *J. Org. Chem.*, **1958**, 23, 1404.
- [3] A. I. Vogel, *Practical Organic Chemistry, Longmans: London*, **1959**, 169.
- [4] R. C. Clark, J. S. Reid, *Acta Crystallographica Section A*, **1995**, 51, 887.
- [5] CrysAlisPro (Oxford Diffraction Ltd.), Version 1.171.33.41, Agilent Technologies, Yarnton, Oxfordshire, England (Release 06-05-2009 CrysAlis171).
- [6] O. V. Dolomanov, L. J. Bourhis, R. J. Gildea, J. A. K. Howard, H. Puschmann, *J. Appl. Cryst.*, **2009**, 42, 339.
- [7] L. Palatinus, G. Chapuis, *J. Appl. Cryst.*, **2007**, 40, 786.
- [8] G. Sheldrick, *Acta Crystallographica Section A*, **2008**, 64, 112.
- [9] A. L. Spek, *J. Appl. Crystallogr.*, **2003**, 36, 7.
- [10] (a) L. Sorace, C. Benelli, D. Gatteschi, *Chem. Soc. Rev.*, 2011, **40**, 3092; (b) G.-J. Chen, Y. Zhou, G.-X. Jin, Y.-B. Dong, *Dalton Trans.*, 2014, **43**, 16659.
